# Supplementary material for: Improving the thermoelectric power factor of PEDOT:PSS films by a simple two-step post-treatment method
Source: publisher site journal article supplement (doi:10.1515/epoly-2017-0098), 2017-07-21
Supplement: Supplementary file 1 [file epoly-2017-0098_suppl.docx]

**Supplementary Material**

**Figure 1:** Potential difference ΔV as a function of ΔT between the two electrodes deposited on the PEDOT:PSS film treated with ethylene glycol and 0.15 wt% hydrazine aqueous solution.
